# Supplementary material for: FAK tyrosine phosphorylation is regulated by AMPK and controls metabolism in human skeletal muscle
Source: Springer Nature journal article supplement (doi:10.1007/s00125-017-4451-8), 2017-10-11
Supplement: MOESM1 [file 15126732]

## Online Supplemental Materials

### ESM Table 1:

#### List of Antibodies used for Western-Blot Analysis

| Target                     | Vendor                                | Product Number |
|----------------------------|---------------------------------------|----------------|
| p-FAK <sup>Y397</sup>      | Cell Signaling (Danvers, MA)          | 3283           |
| FAK total                  | Cell Signaling                        | 3285           |
| p-ACC <sup>S222</sup>      | Cell Signaling                        | 3661           |
| ACC total                  | Cell Signaling                        | 3676           |
| Paxillin total             | Cell Signaling                        | 2542           |
| p-Paxillin <sup>Y118</sup> | Cell Signaling                        | 2541           |
| p-TBC1D4 <sup>S318</sup>   | Cell Signaling                        | 8619           |
| TBC1D4                     | Merck Millipore (Darmstadt, Germany)  | 07-741         |
| p-PKB <sup>T308</sup>      | Cell Signaling                        | 4056           |
| PKB total                  | Cell Signaling                        | 9272           |
| GAPDH                      | Santa Cruz Biotechnology (Dallas, TX) | sc-257758      |

**ESM Table 2:****Oligonucleotides used in the qPCR Analysis**

| <b>Gene</b> | <b>Exons</b> | <b>Forward Primer</b> | <b>Reverse Primer</b> |
|-------------|--------------|-----------------------|-----------------------|
| <i>PTK2</i> | 29-31        | CCTGGACCGGTCGAATGATA  | TGCCATCTCAATCTCTCGGT  |
| <i>PPIB</i> | 2-3          | ATGTAGGCCGGGTGATCTTT  | CATCTCCCCTGGTGAAGTCT  |
| <i>TBP</i>  | 3-5          | TTCGGAGAGTTCTGGGATTG  | GAAAATCAGTGCCGTGGTTC  |
| <i>B2M</i>  | 2-4          | TGTCTTTCAGCAAGGACTGG  | AGCAAGCAAGCAGAATTTGG  |
| <i>TFRC</i> | 15-16        | AATGCTGCTTTCCTTTCCT   | TCCATGGTGGTACCCAAATAA |
